# Supplementary material for: Bijel reinforcement by droplet bridging: a route to bicontinuous materials with large domains
Source: Royal Society of Chemistry journal article supplement (doi:10.1039/c3sm00130j), 2013-01-01
Supplement: c3sm00130j.pdf [file c3sm00130j.pdf]

Supplementary Information for

## Bijel Reinforcement by Droplet Bridging: a Route to Bicontinuous Materials with Large Domains

Jessica A. Witt, Daniel R. Mumm, Ali Mohraz  
Department of Chemical Engineering & Materials Science  
University of California, Irvine  
Irvine, CA 92697  
Email: mohraz@uci.edu

**Video SV1.** Image series showing the evolution of a critical mixture of NM and EG as it undergoes phase separation. The total size of the image is  $1136 \times 1136 \mu\text{m}^2$

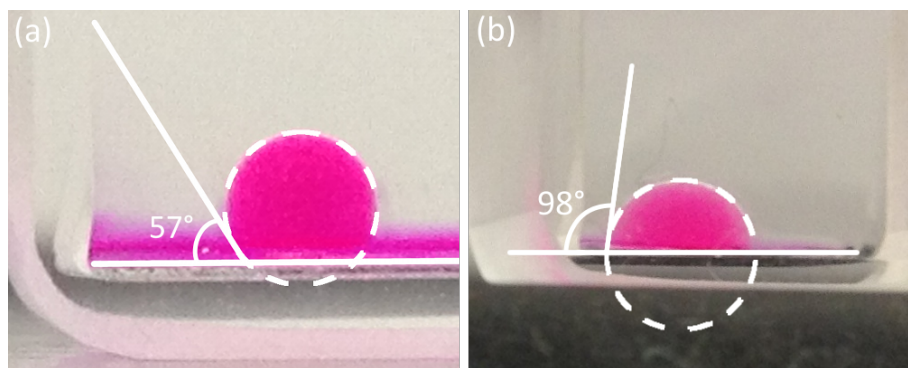

**Figure S1.** Measurement of the three-phase contact angle by the immersed droplet method for bridged bijel particles (a) and simple bijel particles (b). The bottom surface is microscope slide that is spin-coated with the silica particles.

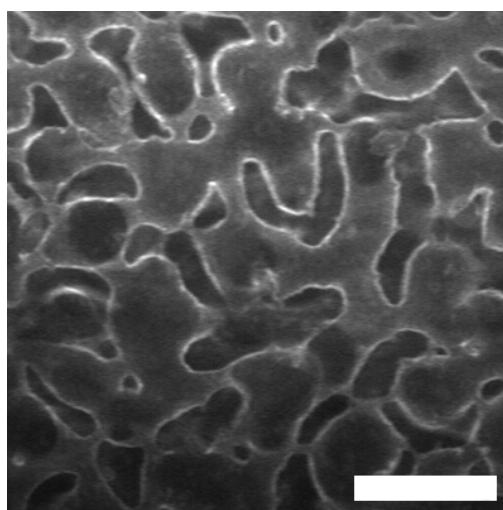

**Figure S2.** Confocal microscopy image of a simple bijel prepared with  $\phi = 0.04$ . Scale bar denotes  $50 \mu\text{m}$

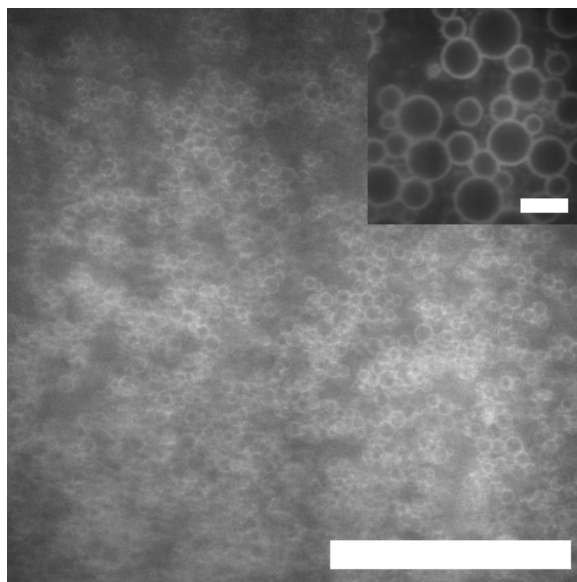

**Figure S3.** Confocal microscopy images of Pickering emulsions prepared with  $\eta = 0.675$  and  $\phi = 0.10$ . Scale bars denote  $100\ \mu\text{m}$  for the main image and  $10\ \mu\text{m}$  for the inset.
